# Supplementary material
Source: PubMed Central journal article supplement (PMC5942590)
Supplement: NIHMS955747-supplement-2.pdf [file NIHMS955747-supplement-2.pdf]

## Supplementary Note 1.

**Cell-cell fusion assay.** CHO cells (a gift from J. M. Coffin) were grown in Ham's F-12 medium supplemented with 10% fetal bovine serum (FBS) at 37°C in the presence of 5% CO<sub>2</sub>, except where noted otherwise. Cells were not tested for Mycoplasma contamination. Plasmids pPEP98, pPEP99, pPEP100, and pPEP101 encode HSV-1 (strain KOS) gB, gD, gH, and gL genes, respectively, in a pCAGGS vector and were gifts from P. G. Spear. Plasmids pCAGT7 (carrying the T7 polymerase gene) and pT7EMCLuc (carrying the firefly luciferase gene) were also gifts from P. G. Spear. Plasmid pSC386 carrying the herpesvirus entry mediator (HVEM) gene and the pCAGGS vector were gifts from G. H. Cohen and R. J. Eisenberg. Cell fusion was measured by using the luciferase assay<sup>27</sup>. CHO cells were seeded into 6-well and 24-well plates and transfected the next day at 70-90% confluence using Lipofectamine 2000. Target cells in the 6-well plate were transfected with 1.6 µg pSC386 (HVEM) DNA and 0.4 µg pT7EMLuc (firefly luciferase) in 1 ml Optimem with 5 µl Lipofectamine 2000 per well. Effector cells in 24-well plates were transfected with 80 ng each pCAGT7 (T7 polymerase), pPEP99 (HSV-1 gD), pPEP100 (HSV-1 gH), and pPEP101 (gL), plus 80 ng of either pCAGGS (empty vector), pPEP98 or pRC30 (WT HSV-1 gB), or a single cysteine gB mutant in 200 µl Optimem and 1 µl Lipofectamine 2000 per well. After 4 hours, the target cells were washed with phosphate-buffered saline (PBS), treated with trypsin, and co-cultured with effector cells at a 1:1 ratio for 16 hrs. Cells were then washed with 1 ml PBS per well and lysed with 200 µl/well of 1x lysis buffer (Promega) and either frozen at -80°C and assayed at a later time or assayed immediately. Luciferase production for each sample was assayed by measuring luminescence on a BioTek plate reader after adding 100 µl of substrate (Promega). After the pCAGGS background was subtracted from all samples, the light output of each mutant was expressed as a percentage of the matched WT gB construct (pPEP98 or pRC30). Every mutant was tested in at least two biological replicates, each consisting of three technical replicates. Values reported here represent average fusion activity of each biological replicate relative to WT gB (100% fusion). Error bars show one standard deviation from the biological replicate average.

**Supplementary Table 1.** Inter-protomer contacts in TMD and CTD

| Protomer B |     | Protomer C |     | Distance, Å |
|------------|-----|------------|-----|-------------|
| LEU 788    | CD2 | LEU 783    | CG  | 3.82        |
| ALA 791    | CB  | GLY 787    | O   | 3.35        |
|            | O   | ALA 790    | CB  | 3.86        |
|            | CB  | ALA 791    | N   | 3.63        |
|            |     |            | CA  | 3.74        |
|            |     |            | CB  | 3.53        |
| PHE 792    | CE2 | LEU 783    | CD1 | 3.86        |
|            | CZ  |            |     | 3.5         |
|            | CE1 | GLY 787    | CA  | 3.4         |
|            |     |            | N   | 3.82        |
| PHE 795    | CB  | ALA 790    | O   | 3.94        |
|            | CG  |            | CB  | 3.75        |
|            |     |            | CD1 | O           |
|            | N   | ALA 794    | CB  | 3.92        |
|            | CA  |            |     | 3.89        |
| VAL 798    | CG1 | TYR 797    | CB  | 3.71        |
|            |     |            | CG  | 3.35        |
|            |     |            | CD1 | 3.66        |
|            |     |            | CD2 | 3.53        |
|            | CG2 |            | CB  | 3.96        |
|            |     |            | CG  | 3.95        |
|            |     |            | CD2 | 3.53        |
| LEU 801    | CD1 | LEU 801    | CD1 | 3.87        |
|            | O   | LEU 809    | CD2 | 3.31        |
| GLN 802    | N   | TYR 797    | OH  | 3.54        |
|            | CA  |            |     | 3.31        |
|            | CB  |            |     | 3.66        |
| PRO 805    | CB  | LEU 809    | CD1 | 3.81        |
|            |     |            | CD2 | 3.74        |
|            | CG  |            | CD1 | 3.82        |
|            |     |            | CD2 | 3.53        |
| MET 806    | CG  | TYR 810    | OH  | 3.35        |
|            | SD  |            |     | 3.71        |
| TYR 810    | CE1 | MET 850    | O   | 3.87        |

|         |         |         |         |      |      |
|---------|---------|---------|---------|------|------|
| TYR 810 | CZ      |         |         | 3.67 |      |
|         | OH      |         |         | C    | 3.43 |
|         |         |         |         | O    | 2.73 |
|         | CE1     |         | VAL 853 | CB   | 3.84 |
|         |         | SER 854 |         | N    | 3.95 |
|         |         |         |         | CA   | 3.59 |
|         |         |         |         | CB   | 3.75 |
|         |         |         |         |      | 3.93 |
|         |         | CZ      |         | OG   | 3.02 |
|         | OH      |         |         | 3.13 |      |
|         |         |         |         | 2.67 |      |
|         | CA      | GLU 857 | CD      | 3.75 |      |
|         |         |         | OE1     | 3.43 |      |
|         |         |         | OE2     | 3.49 |      |
|         |         |         | CD      | 3.79 |      |
|         |         |         | C       | OE1  | 3.00 |
| O       |         |         | OE2     | 3.96 |      |
| CB      |         |         | OE1     | 3.56 |      |
| CG      |         |         | OE2     | 3.69 |      |
| CD1     |         |         |         | 3.72 |      |
| CE1     |         |         |         | 2.89 |      |
|         |         | 3.79    |         |      |      |
| PRO 811 | GLU 857 | CD      | 3.7     |      |      |
|         |         | OE1     | 2.81    |      |      |
|         |         |         | 3.46    |      |      |
|         |         |         | 3.15    |      |      |
|         |         | CG      | 3.52    |      |      |
| CD      | CD      | 3.63    |         |      |      |
|         | OE1     | 3.11    |         |      |      |
| LEU 812 | GLU 857 | CD      | 3.42    |      |      |
|         |         | OE1     | 2.26    |      |      |
|         |         |         | 3.08    |      |      |
|         | C       |         | 3.57    |      |      |
|         | CB      | CG      | 3.65    |      |      |
|         |         | CD      | 3.75    |      |      |
|         |         | OE1     | 3.19    |      |      |
| GLU 860 |         | CD      | 3.97    |      |      |
|         | OE1     | 3.4     |         |      |      |
| CG      | CG      | 3.93    |         |      |      |

|         |         |         |         |         |      |      |
|---------|---------|---------|---------|---------|------|------|
| LEU 812 |         |         | CD      | 3.42    |      |      |
|         |         |         | OE1     | 3.31    |      |      |
|         |         |         | OE2     | 3.81    |      |      |
|         | CD1     |         |         | CD      | 3.6  |      |
|         |         |         |         | OE1     | 3.82 |      |
|         |         |         |         | OE2     | 3.47 |      |
|         |         |         |         | LYS 864 | CE   | 3.96 |
|         |         |         |         |         | NZ   | 3.18 |
| THR 813 | CG2     | VAL 853 | CG1     | 3.52    |      |      |
|         | N       | GLU 857 | CD      | 3.89    |      |      |
|         |         |         | OE1     | 3.09    |      |      |
|         | CG2     |         | CD      | 3.47    |      |      |
|         |         |         | OE1     | 3.49    |      |      |
|         |         |         | OE2     | 3.24    |      |      |
|         |         |         |         |         |      |      |
| LYS 815 | NZ      | LYS 864 | NZ      | 2.87    |      |      |
| GLU 845 | OE2     | LYS 839 | CD      | 3.25    |      |      |
|         |         |         | CE      | 3.29    |      |      |
|         |         |         | NZ      | 3.98    |      |      |
| MET 846 | SD      | ALA 843 | CA      | 3.95    |      |      |
|         |         |         | CB      | 3.8     |      |      |
|         | CE      | MET 846 | CG      | 3.75    |      |      |
|         |         |         | CB      | 3.79    |      |      |
|         |         |         | CE      | 3.81    |      |      |
| ILE 847 | CG2     | MET 806 | CE      | 3.61    |      |      |
|         |         | TYR 810 | CB      | 3.75    |      |      |
|         |         |         | CG      | 3.93    |      |      |
|         |         |         | CD2     | 3.9     |      |      |
|         | CD1     | THR 813 | OG1     |         | 3.64 |      |
|         |         |         |         |         | 3.91 |      |
|         |         |         |         |         | 3.75 |      |
| CG2     | THR 814 |         |         |         |      |      |
| ARG 848 | CG      | THR 813 | O       | 3.91    |      |      |
| TYR 849 | OH      | ASP 834 | O       | 3.88    |      |      |
|         |         |         |         |         | 3.4  |      |
|         | CE1     | ASP 836 | N       | 3.95    |      |      |
|         |         |         |         |         | 3.15 |      |
|         | OH      |         | CA      | 3.72    |      |      |
|         | CD1     |         | LYS 839 | CB      | 3.23 |      |
|         |         |         |         |         | 4.00 |      |

|         |     |         |      |      |
|---------|-----|---------|------|------|
| TYR 849 | CE1 |         |      | 3.67 |
|         | CE2 |         |      | 3.9  |
|         | CZ  |         |      | 3.61 |
|         | O   | LEU 840 | CD1  | 3.57 |
|         | CD1 |         | N    | 3.71 |
| CA      |     |         | 3.91 |      |
| MET 850 | C   | MET 806 | CG   | 3.82 |
|         | CB  |         | CE   | 3.91 |
|         | CE  | ILE 847 | CG1  | 3.61 |
|         |     | MET 850 | SD   | 3.74 |
| ALA 851 | CA  | ASN 804 | OD1  | 3.97 |
|         | CB  |         |      | 3.86 |
|         | N   | MET 806 | CG   | 3.56 |
|         | CA  |         | CB   | 3.98 |
|         |     |         | CG   | 3.66 |
|         |     |         | CB   | 3.78 |
|         | CB  | THR 814 | CG2  | 3.57 |
| VAL 853 | CG2 | LEU 840 | CD1  | 3.53 |
|         | CB  | ILE 847 |      | 3.89 |
|         | CG1 |         |      | 3.58 |
|         | CG2 |         |      | 3.82 |
| SER 854 | CB  | ASN 804 | CA   | 3.55 |
|         |     |         | OD1  | 3.66 |
|         | OG  |         | 3.95 |      |
|         | CB  | PRO 805 | CD   | 3.78 |
|         |     |         | 3.32 |      |
| OG      | CG  |         | 3.88 |      |
| ARG 858 | NE  | SER 803 | CB   | 3.31 |
|         |     |         | CA   | 3.63 |
|         |     |         | C    | 3.44 |
|         | CZ  |         | CB   | 3.63 |
|         |     |         | C    | 3.85 |
|         |     |         | OG   | 3.91 |
|         | NH2 |         | CB   | 3.26 |
|         |     |         | CA   | 3.91 |
|         |     |         | C    | 3.37 |
|         | O   | 3.39    |      |      |

|         |     |         |    |      |
|---------|-----|---------|----|------|
| ARG 858 |     |         | OG | 3.08 |
|         | NE  | ASN 804 | N  | 3.1  |
|         |     |         | CA | 3.77 |
|         |     |         | CB | 3.33 |
|         | CZ  |         | N  | 3.75 |
|         |     |         | CB | 3.37 |
|         | NH2 |         | N  | 3.64 |
|         |     |         | CB | 3.33 |

**Supplementary Table 2.** Mutations and their predicted effect on structure. Interactions  $<4\text{\AA}$  that may be disrupted by the specified mutation are listed in reference to “protomer B”. Mutations identified in HSV-2 are identified with an “\*”. Further residue contact details can be found in Supplementary Fig. 5 and Supplementary Table 1. A truncation resulting from a naturally occurring frameshift, rather than being engineered, is marked with a “#”.

| <b>Hyperfusogenic Point Mutations</b>                                            |                                       |                                                                                                                |                                                                                                                     |
|----------------------------------------------------------------------------------|---------------------------------------|----------------------------------------------------------------------------------------------------------------|---------------------------------------------------------------------------------------------------------------------|
| <b>Mutation</b>                                                                  | <b>Isolated (I) or Engineered (E)</b> | <b>Location in the CTD</b>                                                                                     | <b>Possible effect on the structure</b>                                                                             |
| R796C <sup>2</sup>                                                               | E                                     | TMD, next to R800, may interact with headgroups                                                                | Elimination of basic charge and possible disruption of membrane interactions                                        |
| R800W <sup>2</sup>                                                               | E                                     | TMD, next to R796, may interact with headgroups                                                                | Elimination of basic charge and possible disruption of membrane interactions                                        |
| P805A* <sup>3</sup>                                                              | E                                     | start of h1a, invariant residue                                                                                | Disruption of h1 structure and thus h1/h2 and h1/tmd packing                                                        |
| Y810A* <sup>3</sup>                                                              | E                                     | follows h1a, sc makes HB with sc of S854 and mc of M850 in C                                                   | Disruption of HBs at the h1/h2 interface                                                                            |
| T813I <sup>2</sup>                                                               | E                                     | h1b, sc has numerous weak interactions with h2 of A and C                                                      | Disruption of h1/h2 packing                                                                                         |
| L817H <sup>4</sup> or L817P <sup>5</sup> or E816/L817 2aa insertion <sup>6</sup> | I/E                                   | end of h1b                                                                                                     | Unclear                                                                                                             |
| D836A* <sup>3</sup>                                                              | E                                     | h2, conserved among alphas, contributes negative charge to the inner face, sc makes HBs to A838 and K839 in B. | Unclear, possible decrease in CTD base negative charge, disruption of h1/h2 packing, and h1b to h2 linker structure |
| Y849A* <sup>7</sup>                                                              | E                                     | h2, sc makes HB with mc of D834 and mc of D836 in C                                                            | Disruption of HBs at the h2/h2 interface                                                                            |
| V853A* <sup>3</sup>                                                              | E                                     | h2, sc makes hydrophobic contacts with h1 region of A and h2 of C                                              | Disruption of h1/h2 packing                                                                                         |
| S854F <sup>8</sup>                                                               | I                                     | h2, sc makes HB with sc of Y810 of A and weak interactions with h1a of C                                       | Disruption of HBs at the h1/h2 interface                                                                            |
| A855V <sup>4,9</sup>                                                             | I                                     | h2, no contacts of note                                                                                        | Unclear, potential increase in hydrophobicity                                                                       |
| E857D* <sup>10</sup>                                                             | I                                     | h2, sc makes HBs with mc                                                                                       | Disruption of HBs at the                                                                                            |

|                                             |     |                                                                                                               |                                                                                                                 |
|---------------------------------------------|-----|---------------------------------------------------------------------------------------------------------------|-----------------------------------------------------------------------------------------------------------------|
|                                             |     | of L812 and T813 of A                                                                                         | h1/h2 interface                                                                                                 |
| R858H <sup>6,11</sup> or R858C <sup>2</sup> | I/E | h2, poor density for sc, sc makes weak interactions with tmd-h1a connector of C, may interact with headgroups | Elimination of basic charge and possible disruption of membrane interactions, disruption of h2/TMD/h1 interface |
| T859P <sup>*12</sup>                        | I   | h2, no contacts of note                                                                                       | Proline would disrupt the h2 helix thereby disrupting h1/h2 and h2/tmd packing                                  |
| K864A/K865A/K866A <sup>13</sup>             | E   | C terminus of h2, may interact with headgroups                                                                | Elimination of basic charge and possible disruption of membrane interactions                                    |

| <b>Limited surface expression mutations</b> |                                       |                                                                                                               |                                                     |
|---------------------------------------------|---------------------------------------|---------------------------------------------------------------------------------------------------------------|-----------------------------------------------------|
| <b>Mutation</b>                             | <b>Isolated (I) or Engineered (E)</b> | <b>Location in the CTD</b>                                                                                    | <b>Possible effect on the structure</b>             |
| L801A <sup>*3</sup>                         | E                                     | TMD, faces CTD symmetry axis, mc interacts with h1a of C and sc interacts with equivalent residues on A and C | Disruption of tmd/h1 and threefold tmd interactions |
| M806A <sup>*3</sup>                         | E                                     | h1a, faces CTD symmetry axis, sc contacts h1a-h1b connector of C and h2 of A                                  | Disruption of h1/h1 and h1/h2 interactions          |
| L809A <sup>*3</sup>                         | E                                     | h1a, faces CTD symmetry axis, contacts tmd and h1a of A                                                       | Disruption of h1/tmd and h1/h1 interactions         |
| P811A <sup>*3</sup>                         | E                                     | precedes h1b, invariant residue                                                                               | Disruption of h1 structure and thus h1/h2 packing   |
| M846A <sup>*3</sup>                         | E                                     | h2, faces CTD symmetry axis, sc interacts with equivalent residues on A and C                                 | Disruption of threefold h2 interaction              |
| L852A <sup>*3</sup>                         | E                                     | h2, no known contacts                                                                                         | Unclear                                             |

| <b>Slow rate-of-entry mutation</b> |                                       |                                                     |                                         |
|------------------------------------|---------------------------------------|-----------------------------------------------------|-----------------------------------------|
| <b>Mutation</b>                    | <b>Isolated (I) or Engineered (E)</b> | <b>Location in the CTD</b>                          | <b>Possible effect on the structure</b> |
| A851V <sup>2</sup>                 | I                                     | h2, mc and sc interact weakly with h1a and h1b of C | Stabilization of h1/h2 packing          |



| <b>C-terminal truncations</b>                                 |                     |                                      |                                     |                                                                           |
|---------------------------------------------------------------|---------------------|--------------------------------------|-------------------------------------|---------------------------------------------------------------------------|
| <b>Mutation</b>                                               | <b>Expression</b>   | <b>gB-null virus complementation</b> | <b>Fusion phenotype</b>             | <b>Possible effect on the structure</b>                                   |
| HSV-1<br>gB810 <sup>6</sup>                                   | ND                  | No                                   | No fusion                           | Loss of h1b, h2, and h3; loss of CTD core                                 |
| HSV-1<br>gB838 <sup>6</sup>                                   | ND                  | No                                   | No fusion                           | Loss of h2 and h3; misfolded CTD core                                     |
| HSV-1<br>gB840 <sup>14</sup>                                  | ND                  | No                                   | ND                                  | Loss of h2 and h3; misfolded CTD core                                     |
| HSV-1<br>gB849 <sup>6</sup>                                   | ND                  | No                                   | No fusion                           | Loss of h3, partial loss of h2; misfolded CTD core                        |
| HSV-1<br>gB851 <sup>6,15</sup><br>HSV-2<br>gB851 <sup>7</sup> | Reduced/<br>Reduced | No/<br>No                            | No fusion/<br>No fusion             | Loss of h3, partial loss of h2; misfolded CTD core                        |
| HSV-1<br>gB855 <sup>14</sup><br>HSV-2<br>gB855 <sup>7</sup>   | ND/<br>>WT          | No/<br>Poor                          | ND/<br>Syncytial,<br>hyperfusogenic | Loss of h3, partial loss of h2; misfolded CTD core in HSV-1 but not HSV-2 |
| HSV-2<br>gB858 <sup>7</sup>                                   | >WT                 | Yes                                  | Syncytial,<br>hyperfusogenic        | Loss of h3, partial loss of h2                                            |
| HSV-1<br>gB863 <sup>6</sup>                                   | ND                  | Yes                                  | Reduced                             | Loss of h3, partial loss of h2                                            |
| HSV-2<br>gB866 <sup>7</sup>                                   | >WT                 | Yes                                  | Syncytial,<br>hyperfusogenic        | Loss of h3                                                                |
| HSV-1<br>gB868 <sup>15,16</sup>                               | WT                  | ND                                   | Hyperfusogenic                      | Loss of h3                                                                |
| HSV-2<br>gB870 <sup>12#</sup>                                 | WT                  | ND                                   | Syncytial                           | Loss of h3                                                                |
| HSV-2<br>gB874 <sup>7</sup>                                   | >WT                 | Yes                                  | Syncytial,<br>hyperfusogenic        | Loss of h3                                                                |
| HSV-1<br>gB876 <sup>14-16</sup>                               | WT                  | Yes                                  | Syncytial,<br>hyperfusogenic        | Partial loss of h3                                                        |
| HSV-2<br>gB879 <sup>7</sup>                                   | >WT                 | Yes                                  | Syncytial,<br>hyperfusogenic        | Partial loss of h3                                                        |
| HSV-2<br>gB884 <sup>7</sup>                                   | >WT                 | Yes                                  | hyperfusogenic                      | Loss of unstructured C terminus                                           |
| HSV-1<br>gB888 <sup>16</sup>                                  | ND                  | ND                                   | WT                                  | Loss of unstructured C terminus                                           |
| HSV-2<br>gB894 <sup>7</sup>                                   | WT                  | Yes                                  | WT                                  | Loss of unstructured C terminus                                           |

## Supplementary References

1. Davis, I.W. et al. MolProbity: all-atom contacts and structure validation for proteins and nucleic acids. *Nucleic Acids Res* **35**, W375-83 (2007).
2. Gage, P.J., Levine, M. & Glorioso, J.C. Syncytium-inducing mutations localize to two discrete regions within the cytoplasmic domain of herpes simplex virus type 1 glycoprotein B. *J Virol* **67**, 2191-201 (1993).
3. Ruel, N., Zago, A. & Spear, P.G. Alanine substitution of conserved residues in the cytoplasmic tail of herpes simplex virus gB can enhance or abolish cell fusion activity and viral entry. *Virology* **346**, 229-37 (2006).
4. Engel, J.P., Boyer, E.P. & Goodman, J.L. Two novel single amino acid syncytial mutations in the carboxy terminus of glycoprotein B of herpes simplex virus type 1 confer a unique pathogenic phenotype. *Virology* **192**, 112-20 (1993).
5. Diakidi-Kosta, A., Michailidou, G., Kontogounis, G., Sivropoulou, A. & Arsenakis, M. A single amino acid substitution in the cytoplasmic tail of the glycoprotein B of herpes simplex virus 1 affects both syncytium formation and binding to intracellular heparan sulfate. *Virus Res* **93**, 99-108 (2003).
6. Cai, W.H., Gu, B. & Person, S. Role of glycoprotein B of herpes simplex virus type 1 in viral entry and cell fusion. *J Virol* **62**, 2596-604 (1988).
7. Fan, Z. et al. Truncation of herpes simplex virus type 2 glycoprotein B increases its cell surface expression and activity in cell-cell fusion, but these properties are unrelated. *J Virol* **76**, 9271-83 (2002).
8. Walev, I., Lingen, M., Lazzaro, M., Weise, K. & Falke, D. Cyclosporin A resistance of herpes simplex virus-induced "fusion from within" as a phenotypical marker of mutations in the Syn 3 locus of the glycoprotein B gene. *Virus Genes* **8**, 83-6 (1994).
9. Haanes, E.J., Nelson, C.M., Soule, C.L. & Goodman, J.L. The UL45 gene product is required for herpes simplex virus type 1 glycoprotein B-induced fusion. *J Virol* **68**, 5825-34 (1994).
10. Muggeridge, M.I. Characterization of cell-cell fusion mediated by herpes simplex virus 2 glycoproteins gB, gD, gH and gL in transfected cells. *J. Gen. Virol.*, 2017-2027 (2000).
11. Bzik, D.J., Fox, B.A., DeLuca, N.A. & Person, S. Nucleotide sequence of a region of the herpes simplex virus type 1 gB glycoprotein gene: mutations affecting rate of virus entry and cell fusion. *Virology* **137**, 185-90 (1984).
12. Muggeridge, M.I., Grantham, M.L. & Johnson, F.B. Identification of syncytial mutations in a clinical isolate of herpes simplex virus 2. *Virology* **328**, 244-53 (2004).
13. Rogalin, H.B. & Heldwein, E.E. The interplay between the HSV-1 gB cytodomains and the gH cytotoil during cell-cell fusion. *J Virol* (2015).
14. Baghian, A., Huang, L., Newman, S., Jayachandra, S. & Kousoulas, K.G. Truncation of the carboxy-terminal 28 amino acids of glycoprotein B specified by herpes simplex virus type 1 mutant amb1511-7 causes extensive cell fusion. *J Virol* **67**, 2396-401 (1993).
15. Silverman, J.L., Greene, N.G., King, D.S. & Heldwein, E.E. Membrane Requirement for Folding of the Herpes Simplex Virus 1 gB Cytodomain Suggests a Unique Mechanism of Fusion Regulation. *Journal of virology* **86**, 8171-84 (2012).
16. Foster, T.P., Melancon, J.M. & Kousoulas, K.G. An alpha-helical domain within the carboxyl terminus of herpes simplex virus type 1 (HSV-1) glycoprotein B (gB) is

associated with cell fusion and resistance to heparin inhibition of cell fusion. *Virology* **287**, 18-29 (2001).
